# Supplementary material for: Deploying deep learning models on unseen medical imaging using adversarial domain adaptation
Source: PubMed Central journal article supplement (PMC9565422; doi:10.1371/journal.pone.0273262), 2022-10-14
Supplement: pone.0273262.s001.pdf [file pone.0273262.s001.pdf]

## SUPPLEMENTAL TABLES

**Supplemental Table 1. Characteristics of the digits datasets.**

|               | <b>MNIST</b> | <b>MNISTM</b> | <b>USPS</b>  | <b>P-value</b> |
|---------------|--------------|---------------|--------------|----------------|
| Images, n     | 70,000       | 70,000        | 9,298        |                |
| Digits, n (%) |              |               |              |                |
| Zero          | 6,903 (9.9)  | 6,903 (9.9)   | 1,553 (16.7) | <0.001         |
| One           | 7,877 (11.3) | 7,877 (11.3)  | 1,269 (13.6) | <0.001         |
| Two           | 6,990 (10.0) | 6,990 (10.0)  | 929 (10.0)   | 0.998          |
| Three         | 7,141 (10.2) | 7,141 (10.2)  | 824 (8.9)    | <0.001         |
| Four          | 6,824 (9.7)  | 6,824 (9.7)   | 852 (9.2)    | 0.182          |
| Five          | 6,313 (9.0)  | 6,313 (9.0)   | 716 (7.7)    | <0.001         |
| Six           | 6,876 (9.8)  | 6,876 (9.8)   | 834 (9.0)    | 0.027          |
| Seven         | 7,293 (10.4) | 7,293 (10.4)  | 792 (8.5)    | <0.001         |
| Eight         | 6,825 (9.8)  | 6,825 (9.8)   | 708 (7.6)    | <0.001         |
| Nine          | 6,958 (9.9)  | 6,958 (9.9)   | 821 (8.8)    | 0.002          |

**Supplemental Table 2. Characteristics of the chest x-ray datasets.**

|                | <b>Beth Israel</b> | <b>NIH</b>      | <b>San Juan</b> | <b>Stanford</b> | <b>P-value</b> |
|----------------|--------------------|-----------------|-----------------|-----------------|----------------|
| Radiographs, n | 371,920            | 112,120         | 160,861         | 223,648         |                |
| AP/PA, n (%)   | 250,044 (67.3)     | 112,120 (100.0) | 63,848 (39.7)   | 191,229 (85.5)  | <0.001         |

|                      |                |               |               |                |        |
|----------------------|----------------|---------------|---------------|----------------|--------|
| Patients, n          | 65,088         | 30,805        | 67,625        | 64,740         |        |
| Patient demographics |                |               |               |                |        |
| Age, mean (SD)       | -              | 46.1 (16.7)   | -             | 60.3 (18.6)    | <0.001 |
| Female, n (%)        | -              | 14,175 (46.0) | 34,986 (51.7) | 28,822 (44.5)  | <0.001 |
| Opacity, n (%)       | 118,452 (47.4) | 39,458 (35.2) | 11,002 (18.9) | 137,675 (72.0) | <0.001 |

**Supplemental Table 3. Results of baseline bespoke models trained on chest x-rays from a single hospital site and evaluated on chest x-rays from target hospital sites.**

| Train Site (No. Images)   | Comparison Type | Test Site (No. Images)   | Accuracy (SD)        | AUC (SD)             | Sensitivity (SD)     | Specificity (SD)     | PPV (SD)             | NPV (SD)             |
|---------------------------|-----------------|--------------------------|----------------------|----------------------|----------------------|----------------------|----------------------|----------------------|
| Beth Israel (N = 200,313) | Internal        | Beth Israel (N = 24,780) | 0.746 (0.013)        | <b>0.819 (0.013)</b> | 0.703 (0.019)        | 0.797 (0.019)        | 0.806 (0.018)        | 0.691 (0.019)        |
|                           | External        | NIH (N = 11,517)         | 0.654 (0.015)        | 0.694 (0.017)        | 0.515 (0.024)        | 0.760 (0.018)        | 0.618 (0.025)        | 0.674 (0.019)        |
|                           | External        | San Juan (N = 5,974)     | <b>0.808 (0.012)</b> | 0.729 (0.019)        | 0.556 (0.052)        | <b>0.834 (0.012)</b> | 0.255 (0.031)        | <b>0.948 (0.008)</b> |
|                           | External        | Stanford (N = 19,386)    | 0.771 (0.013)        | 0.779 (0.017)        | <b>0.840 (0.013)</b> | 0.585 (0.031)        | <b>0.847 (0.014)</b> | 0.571 (0.029)        |
| NIH (N = 89,722)          | Internal        | NIH (N = 11,517)         | 0.665 (0.015)        | 0.713 (0.017)        | 0.528 (0.024)        | 0.763 (0.018)        | 0.616 (0.026)        | 0.692 (0.018)        |
|                           | External        | Beth Israel (N = 24,780) | 0.675 (0.015)        | <b>0.768 (0.015)</b> | 0.612 (0.019)        | 0.806 (0.022)        | 0.867 (0.015)        | 0.500 (0.022)        |
|                           | External        | San Juan (N = 5,974)     | <b>0.787 (0.013)</b> | 0.699 (0.020)        | 0.455 (0.047)        | <b>0.832 (0.013)</b> | 0.267 (0.031)        | <b>0.919 (0.010)</b> |
|                           | External        | Stanford (N = 19,386)    | 0.747 (0.013)        | 0.718 (0.018)        | <b>0.796 (0.014)</b> | 0.551 (0.035)        | <b>0.876 (0.012)</b> | 0.405 (0.030)        |
| San Juan (N = 46,495)     | Internal        | San Juan (N = 5,974)     | 0.685 (0.015)        | <b>0.792 (0.018)</b> | 0.368 (0.024)        | <b>0.922 (0.011)</b> | 0.779 (0.029)        | <b>0.661 (0.017)</b> |
|                           | External        | Beth Israel (N = 24,780) | 0.560 (0.016)        | 0.675 (0.017)        | 0.520 (0.017)        | 0.882 (0.032)        | 0.973 (0.008)        | 0.184 (0.017)        |
|                           | External        | NIH (N = 11,517)         | 0.526 (0.016)        | 0.679 (0.018)        | 0.421 (0.018)        | 0.814 (0.024)        | 0.861 (0.018)        | 0.339 (0.019)        |
|                           | External        | Stanford (N = 19,386)    | <b>0.740 (0.013)</b> | 0.664 (0.020)        | <b>0.741 (0.014)</b> | 0.700 (0.079)        | <b>0.986 (0.004)</b> | 0.088 (0.017)        |

|                           |          |                             |                                |                                |                                |                                |                                |                                |
|---------------------------|----------|-----------------------------|--------------------------------|--------------------------------|--------------------------------|--------------------------------|--------------------------------|--------------------------------|
| Stanford<br>(N = 152,579) | Internal | Stanford<br>(N = 19,386)    | 0.737<br>(0.014)               | <b>0.800</b><br><b>(0.016)</b> | <b>0.872</b><br><b>(0.013)</b> | 0.515<br>(0.026)               | <b>0.748</b><br><b>(0.016)</b> | 0.708<br>(0.027)               |
|                           | External | Beth Israel<br>(N = 24,780) | 0.722<br>(0.014)               | 0.797<br>(0.014)               | 0.741<br>(0.021)               | 0.708<br>(0.019)               | 0.639<br>(0.022)               | 0.797<br>(0.017)               |
|                           | External | NIH<br>(N = 11,517)         | 0.672<br>(0.015)               | 0.676<br>(0.018)               | 0.553<br>(0.029)               | 0.721<br>(0.017)               | 0.445<br>(0.026)               | 0.799<br>(0.016)               |
|                           | External | San Juan<br>(N = 5,974)     | <b>0.805</b><br><b>(0.013)</b> | 0.694<br>(0.021)               | 0.671<br>(0.103)               | <b>0.808</b><br><b>(0.013)</b> | 0.072<br>(0.018)               | <b>0.991</b><br><b>(0.003)</b> |

**Supplemental Table 4. Results of adapted models trained on chest x-rays from a single hospital site and evaluated on chest x-rays from target hospital sites.** Yellow shading indicates baseline performance on internal validation. Green shading represents improvements on baseline performance via adaptation.

| Train Site<br>(No. Images)   | Comparison Type | Test Site<br>(No. Images)   | Accuracy<br>(SD) | AUC<br>(SD)      | Sensitivity<br>(SD) | Specificity<br>(SD) | PPV<br>(SD)      | NPV<br>(SD)      |
|------------------------------|-----------------|-----------------------------|------------------|------------------|---------------------|---------------------|------------------|------------------|
| Beth Israel<br>(N = 200,313) | Internal        | Beth Israel<br>(N = 24,780) | 0.746<br>(0.013) | 0.819<br>(0.013) | 0.703<br>(0.019)    | 0.797<br>(0.019)    | 0.806<br>(0.018) | 0.691<br>(0.019) |
|                              | External        | NIH<br>(N = 11,517)         | 0.683<br>(0.015) | 0.701<br>(0.018) | 0.568<br>(0.029)    | 0.734<br>(0.017)    | 0.485<br>(0.027) | 0.794<br>(0.016) |
|                              | External        | San Juan<br>(N = 5,974)     | 0.810<br>(0.012) | 0.717<br>(0.021) | 0.673<br>(0.083)    | 0.814<br>(0.012)    | 0.113<br>(0.023) | 0.986<br>(0.004) |
|                              | External        | Stanford<br>(N = 19,386)    | 0.736<br>(0.014) | 0.788<br>(0.017) | 0.867<br>(0.013)    | 0.514<br>(0.026)    | 0.752<br>(0.016) | 0.695<br>(0.029) |
| NIH<br>(N = 89,722)          | Internal        | NIH<br>(N = 11,517)         | 0.665<br>(0.015) | 0.713<br>(0.017) | 0.528<br>(0.024)    | 0.763<br>(0.018)    | 0.616<br>(0.026) | 0.692<br>(0.018) |
|                              | External        | Beth Israel<br>(N = 24,780) | 0.708<br>(0.014) | 0.773<br>(0.015) | 0.667<br>(0.020)    | 0.757<br>(0.021)    | 0.770<br>(0.019) | 0.652<br>(0.020) |
|                              | External        | San Juan<br>(N = 5,974)     | 0.780<br>(0.013) | 0.691<br>(0.021) | 0.435<br>(0.042)    | 0.836<br>(0.013)    | 0.302<br>(0.032) | 0.901<br>(0.010) |
|                              | External        | Stanford<br>(N = 19,386)    | 0.738<br>(0.014) | 0.753<br>(0.018) | 0.836<br>(0.014)    | 0.519<br>(0.029)    | 0.796<br>(0.015) | 0.585<br>(0.030) |
| San Juan<br>(N = 46,495)     | Internal        | San Juan<br>(N = 5,974)     | 0.685<br>(0.015) | 0.792<br>(0.018) | 0.368<br>(0.024)    | 0.922<br>(0.011)    | 0.779<br>(0.029) | 0.661<br>(0.017) |
|                              | External        | Beth Israel<br>(N = 24,780) | 0.663<br>(0.015) | 0.740<br>(0.016) | 0.697<br>(0.025)    | 0.644<br>(0.019)    | 0.517<br>(0.023) | 0.796<br>(0.018) |
|                              | External        | NIH<br>(N = 11,517)         | 0.667<br>(0.016) | 0.692<br>(0.018) | 0.537<br>(0.027)    | 0.735<br>(0.018)    | 0.516<br>(0.026) | 0.751<br>(0.017) |
|                              | External        | Stanford<br>(N = 19,386)    | 0.509<br>(0.015) | 0.718<br>(0.018) | 0.867<br>(0.018)    | 0.340<br>(0.017)    | 0.382<br>(0.018) | 0.844<br>(0.022) |

|                           |          |                             |                  |                  |                  |                  |                  |                  |
|---------------------------|----------|-----------------------------|------------------|------------------|------------------|------------------|------------------|------------------|
| Stanford<br>(N = 152,579) | Internal | Stanford<br>(N = 19,386)    | 0.737<br>(0.014) | 0.800<br>(0.016) | 0.872<br>(0.013) | 0.515<br>(0.026) | 0.748<br>(0.016) | 0.708<br>(0.027) |
|                           | External | Beth Israel<br>(N = 24,780) | 0.725<br>(0.014) | 0.801<br>(0.014) | 0.738<br>(0.021) | 0.716<br>(0.020) | 0.655<br>(0.022) | 0.789<br>(0.017) |
|                           | External | NIH<br>(N = 11,517)         | 0.683<br>(0.015) | 0.699<br>(0.017) | 0.600<br>(0.035) | 0.704<br>(0.016) | 0.343<br>(0.025) | 0.872<br>(0.013) |
|                           | External | San Juan<br>(N = 5,974)     | 0.802<br>(0.013) | 0.696<br>(0.020) | 0.642<br>(0.136) | 0.804<br>(0.013) | 0.042<br>(0.014) | 0.994<br>(0.003) |

**Supplemental Table 5. Results of baseline global models trained on incremental amounts of handwritten digits from all available datasets and evaluated on the global test set and dataset-specific test sets.**

| Train Site<br>(No. Images)              | Comparison Type    | Test Site<br>(No. Images)             | Accuracy<br>(SD)               | AUC<br>(SD)                    |
|-----------------------------------------|--------------------|---------------------------------------|--------------------------------|--------------------------------|
| MNIST + MNISTM + USPS<br>0.1% (N = 128) | All Datasets       | MNIST + MNISTM + USPS<br>(N = 22,007) | 0.492<br>(0.016)               | 0.834<br>(0.008)               |
|                                         | Individual Dataset | MNIST<br>(N = 10,000)                 | <b>0.630</b><br><b>(0.015)</b> | <b>0.931</b><br><b>(0.004)</b> |
|                                         | Individual Dataset | MNISTM<br>(N = 10,000)                | 0.384<br>(0.016)               | 0.719<br>(0.011)               |
|                                         | Individual Dataset | USPS<br>(N = 2,007)                   | 0.438<br>(0.016)               | 0.834<br>(0.007)               |
| MNIST + MNISTM + USPS<br>1% (N = 1,273) | All Datasets       | MNIST + MNISTM + USPS<br>(N = 22,007) | 0.798<br>(0.013)               | 0.973<br>(0.003)               |
|                                         | Individual Dataset | MNIST<br>(N = 10,000)                 | <b>0.925</b><br><b>(0.008)</b> | <b>0.995</b><br><b>(0.001)</b> |
|                                         | Individual Dataset | MNISTM<br>(N = 10,000)                | 0.720<br>(0.014)               | 0.957<br>(0.004)               |
|                                         | Individual Dataset | USPS<br>(N = 2,007)                   | 0.743<br>(0.013)               | 0.960<br>(0.003)               |
| MNIST + MNISTM + USPS<br>5% (N = 6,365) | All Datasets       | MNIST + MNISTM + USPS<br>(N = 22,007) | 0.913<br>(0.009)               | 0.993<br>(0.001)               |
|                                         | Individual Dataset | MNIST<br>(N = 10,000)                 | <b>0.978</b><br><b>(0.005)</b> | <b>0.999</b><br><b>(0.00)</b>  |
|                                         | Individual Dataset | MNISTM<br>(N = 10,000)                | 0.871<br>(0.010)               | 0.988<br>(0.002)               |
|                                         | Individual Dataset | USPS<br>(N = 2,007)                   | 0.893<br>(0.010)               | 0.991<br>(0.002)               |
|                                         | All Datasets       | MNIST + MNISTM + USPS<br>(N = 22,007) | 0.933<br>(0.008)               | 0.996<br>(0.001)               |

|                                            |                    |                                       |                                |                              |
|--------------------------------------------|--------------------|---------------------------------------|--------------------------------|------------------------------|
| MNIST + MNISTM + USPS<br>10% (N = 12,730)  | Individual Dataset | MNIST<br>(N = 10,000)                 | <b>0.978</b><br><b>(0.005)</b> | <b>1.00</b><br><b>(0.00)</b> |
|                                            | Individual Dataset | MNISTM<br>(N = 10,000)                | 0.905<br>(0.009)               | 0.994<br>(0.001)             |
|                                            | Individual Dataset | USPS<br>(N = 2,007)                   | 0.942<br>(0.007)               | 0.994<br>(0.002)             |
| MNIST + MNISTM + USPS<br>20% (N = 25,459)  | All Datasets       | MNIST + MNISTM + USPS<br>(N = 22,007) | 0.938<br>(0.008)               | 0.997<br>(0.001)             |
|                                            | Individual Dataset | MNIST<br>(N = 10,000)                 | <b>0.986</b><br><b>(0.004)</b> | <b>1.00</b><br><b>(0.00)</b> |
|                                            | Individual Dataset | MNISTM<br>(N = 10,000)                | 0.921<br>(0.008)               | 0.997<br>(0.001)             |
|                                            | Individual Dataset | USPS<br>(N = 2,007)                   | 0.930<br>(0.008)               | 0.996<br>(0.001)             |
| MNIST + MNISTM + USPS<br>40% (N = 50,917)  | All Datasets       | MNIST + MNISTM + USPS<br>(N = 22,007) | 0.954<br>(0.007)               | 0.998<br>(0.001)             |
|                                            | Individual Dataset | MNIST<br>(N = 10,000)                 | <b>0.988</b><br><b>(0.003)</b> | <b>1.00</b><br><b>(0.00)</b> |
|                                            | Individual Dataset | MNISTM<br>(N = 10,000)                | 0.939<br>(0.008)               | 0.998<br>(0.00)              |
|                                            | Individual Dataset | USPS<br>(N = 2,007)                   | 0.951<br>(0.007)               | 0.997<br>(0.001)             |
| MNIST + MNISTM + USPS<br>60% (N = 76,375)  | All Datasets       | MNIST + MNISTM + USPS<br>(N = 22,007) | 0.959<br>(0.006)               | 0.998<br>(0.001)             |
|                                            | Individual Dataset | MNIST<br>(N = 10,000)                 | <b>0.991</b><br><b>(0.003)</b> | <b>1.00</b><br><b>(0.00)</b> |
|                                            | Individual Dataset | MNISTM<br>(N = 10,000)                | 0.946<br>(0.007)               | 0.999<br>(0.00)              |
|                                            | Individual Dataset | USPS<br>(N = 2,007)                   | 0.948<br>(0.007)               | 0.997<br>(0.001)             |
| MNIST + MNISTM + USPS<br>80% (N = 101,833) | All Datasets       | MNIST + MNISTM + USPS<br>(N = 22,007) | 0.964<br>(0.006)               | 0.998<br>(0.001)             |
|                                            | Individual Dataset | MNIST<br>(N = 10,000)                 | <b>0.994</b><br><b>(0.003)</b> | <b>1.00</b><br><b>(0.00)</b> |
|                                            | Individual Dataset | MNISTM<br>(N = 10,000)                | 0.948<br>(0.007)               | 0.998<br>(0.001)             |
|                                            | Individual Dataset | USPS<br>(N = 2,007)                   | 0.954<br>(0.007)               | 0.998<br>(0.001)             |

|                                             |                    |                                       |                                |                              |
|---------------------------------------------|--------------------|---------------------------------------|--------------------------------|------------------------------|
| MNIST + MNISTM + USPS<br>100% (N = 127,291) | All Datasets       | MNIST + MNISTM + USPS<br>(N = 22,007) | 0.967<br>(0.006)               | 0.999<br>(0.00)              |
|                                             | Individual Dataset | MNIST<br>(N = 10,000)                 | <b>0.989</b><br><b>(0.003)</b> | <b>1.00</b><br><b>(0.00)</b> |
|                                             | Individual Dataset | MNISTM<br>(N = 10,000)                | 0.954<br>(0.007)               | 0.999<br>(0.00)              |
|                                             | Individual Dataset | USPS<br>(N = 2,007)                   | 0.964<br>(0.006)               | 0.999<br>(0.00)              |

**Supplemental Table 6. Results of baseline global models trained on incremental numbers of chest x-rays from all available hospital sites and evaluated on the global test set and site-specific test sets.**

| Train Site<br>(No. Images)                                 | Comparison Type | Test Site<br>(No. Images)                                  | Accuracy<br>(SD)               | AUC<br>(SD)                    | Sensitivity<br>(SD)            | Specificity<br>(SD)            | PPV<br>(SD)                    | NPV<br>(SD)                    |
|------------------------------------------------------------|-----------------|------------------------------------------------------------|--------------------------------|--------------------------------|--------------------------------|--------------------------------|--------------------------------|--------------------------------|
| Beth Israel + NIH + San Juan + Stanford<br>0.1% (N = 489)  | All Sites       | Beth Israel + NIH +<br>San Juan + Stanford<br>(N = 61,657) | 0.703<br>(0.015)               | <b>0.766</b><br><b>(0.015)</b> | 0.722<br>(0.021)               | 0.686<br>(0.020)               | 0.671<br>(0.021)               | 0.736<br>(0.021)               |
|                                                            | Individual Site | Beth Israel<br>(N = 24,780)                                | 0.677<br>(0.015)               | 0.737<br>(0.016)               | 0.675<br>(0.022)               | 0.678<br>(0.020)               | 0.616<br>(0.021)               | 0.732<br>(0.019)               |
|                                                            | Individual Site | NIH<br>(N = 11,517)                                        | 0.655<br>(0.015)               | 0.645<br>(0.019)               | 0.529<br>(0.032)               | 0.691<br>(0.016)               | 0.331<br>(0.026)               | 0.836<br>(0.015)               |
|                                                            | Individual Site | San Juan<br>(N = 5,974)                                    | <b>0.797</b><br><b>(0.012)</b> | 0.627<br>(0.023)               | 0.475<br>(0.080)               | <b>0.809</b><br><b>(0.013)</b> | 0.091<br>(0.020)               | <b>0.975</b><br><b>(0.005)</b> |
|                                                            | Individual Site | Stanford<br>(N = 19,386)                                   | 0.736<br>(0.014)               | 0.705<br>(0.018)               | <b>0.790</b><br><b>(0.015)</b> | 0.523<br>(0.035)               | <b>0.866</b><br><b>(0.012)</b> | 0.390<br>(0.030)               |
| Beth Israel + NIH + San Juan + Stanford<br>1% (N = 4,891)  | All Sites       | Beth Israel + NIH +<br>San Juan + Stanford<br>(N = 61,657) | 0.716<br>(0.015)               | <b>0.797</b><br><b>(0.015)</b> | 0.673<br>(0.018)               | 0.793<br>(0.022)               | 0.853<br>(0.016)               | 0.576<br>(0.023)               |
|                                                            | Individual Site | Beth Israel<br>(N = 24,780)                                | 0.697<br>(0.015)               | 0.777<br>(0.014)               | 0.635<br>(0.019)               | 0.808<br>(0.021)               | 0.855<br>(0.016)               | 0.554<br>(0.022)               |
|                                                            | Individual Site | NIH<br>(N = 11,517)                                        | 0.653<br>(0.015)               | 0.676<br>(0.018)               | 0.514<br>(0.023)               | 0.747<br>(0.018)               | 0.578<br>(0.027)               | 0.694<br>(0.018)               |
|                                                            | Individual Site | San Juan<br>(N = 5,974)                                    | 0.744<br>(0.014)               | 0.704<br>(0.021)               | 0.388<br>(0.031)               | <b>0.859</b><br><b>(0.013)</b> | 0.474<br>(0.035)               | <b>0.812</b><br><b>(0.014)</b> |
|                                                            | Individual Site | Stanford<br>(N = 19,386)                                   | <b>0.769</b><br><b>(0.014)</b> | 0.742<br>(0.018)               | <b>0.773</b><br><b>(0.014)</b> | 0.727<br>(0.046)               | <b>0.965</b><br><b>(0.007)</b> | 0.250<br>(0.026)               |
| Beth Israel + NIH + San Juan + Stanford<br>5% (N = 24,455) | All Sites       | Beth Israel + NIH +<br>San Juan + Stanford<br>(N = 61,657) | 0.747<br>(0.014)               | <b>0.816</b><br><b>(0.014)</b> | 0.764<br>(0.018)               | 0.732<br>(0.020)               | 0.725<br>(0.020)               | 0.770<br>(0.019)               |
|                                                            | Individual Site | Beth Israel<br>(N = 24,780)                                | 0.732<br>(0.014)               | 0.797<br>(0.014)               | 0.714<br>(0.021)               | 0.749<br>(0.019)               | 0.727<br>(0.020)               | 0.737<br>(0.020)               |
|                                                            | Individual Site | NIH<br>(N = 11,517)                                        | 0.688<br>(0.014)               | 0.699<br>(0.017)               | 0.611<br>(0.033)               | 0.708<br>(0.015)               | 0.355<br>(0.026)               | 0.874<br>(0.014)               |

|                                                              |                 |                                                            |                                |                  |                                |                                |                                |                                |
|--------------------------------------------------------------|-----------------|------------------------------------------------------------|--------------------------------|------------------|--------------------------------|--------------------------------|--------------------------------|--------------------------------|
|                                                              | Individual Site | San Juan<br>(N = 5,974)                                    | <b>0.806</b><br><b>(0.013)</b> | 0.712<br>(0.021) | 0.605<br>(0.081)               | <b>0.815</b><br><b>(0.013)</b> | 0.115<br>(0.022)               | <b>0.981</b><br><b>(0.005)</b> |
|                                                              | Individual Site | Stanford<br>(N = 19,386)                                   | 0.781<br>(0.013)               | 0.776<br>(0.018) | <b>0.828</b><br><b>(0.014)</b> | 0.622<br>(0.033)               | <b>0.882</b><br><b>(0.012)</b> | 0.513<br>(0.032)               |
| Beth Israel + NIH + San Juan + Stanford<br>10% (N = 48,910)  | All Sites       | Beth Israel + NIH +<br>San Juan + Stanford<br>(N = 61,657) | 0.751<br>(0.014)               | 0.822<br>(0.013) | <b>0.761</b><br><b>(0.018)</b> | 0.741<br>(0.020)               | <b>0.741</b><br><b>(0.020)</b> | 0.761<br>(0.019)               |
|                                                              | Individual Site | Beth Israel<br>(N = 24,780)                                | 0.737<br>(0.014)               | 0.803<br>(0.014) | <b>0.717</b><br><b>(0.021)</b> | 0.755<br>(0.019)               | <b>0.736</b><br><b>(0.020)</b> | 0.737<br>(0.019)               |
|                                                              | Individual Site | NIH<br>(N = 11,517)                                        | 0.688<br>(0.015)               | 0.704<br>(0.017) | <b>0.594</b><br><b>(0.031)</b> | 0.720<br>(0.016)               | <b>0.411</b><br><b>(0.027)</b> | 0.843<br>(0.015)               |
|                                                              | Individual Site | San Juan<br>(N = 5,974)                                    | 0.806<br>(0.013)               | 0.711<br>(0.021) | <b>0.652</b><br><b>(0.098)</b> | 0.810<br>(0.013)               | <b>0.080</b><br><b>(0.019)</b> | 0.989<br>(0.004)               |
|                                                              | Individual Site | Stanford<br>(N = 19,386)                                   | 0.787<br>(0.013)               | 0.788<br>(0.017) | <b>0.825</b><br><b>(0.014)</b> | 0.645<br>(0.033)               | <b>0.897</b><br><b>(0.011)</b> | 0.496<br>(0.031)               |
| Beth Israel + NIH + San Juan + Stanford<br>20% (N = 97,821)  | All Sites       | Beth Israel + NIH +<br>San Juan + Stanford<br>(N = 61,657) | 0.752<br>(0.014)               | 0.824<br>(0.013) | <b>0.743</b><br><b>(0.018)</b> | 0.762<br>(0.020)               | <b>0.779</b><br><b>(0.019)</b> | 0.724<br>(0.020)               |
|                                                              | Individual Site | Beth Israel<br>(N = 24,780)                                | 0.738<br>(0.014)               | 0.807<br>(0.014) | <b>0.699</b><br><b>(0.020)</b> | 0.782<br>(0.019)               | <b>0.787</b><br><b>(0.019)</b> | 0.693<br>(0.021)               |
|                                                              | Individual Site | NIH<br>(N = 11,517)                                        | 0.687<br>(0.015)               | 0.707<br>(0.017) | <b>0.584</b><br><b>(0.029)</b> | 0.725<br>(0.016)               | <b>0.439</b><br><b>(0.026)</b> | 0.825<br>(0.015)               |
|                                                              | Individual Site | San Juan<br>(N = 5,974)                                    | 0.809<br>(0.013)               | 0.717<br>(0.021) | <b>0.612</b><br><b>(0.073)</b> | 0.818<br>(0.012)               | <b>0.139</b><br><b>(0.024)</b> | 0.978<br>(0.005)               |
|                                                              | Individual Site | Stanford<br>(N = 19,386)                                   | 0.790<br>(0.013)               | 0.790<br>(0.017) | <b>0.812</b><br><b>(0.014)</b> | 0.685<br>(0.035)               | <b>0.925</b><br><b>(0.009)</b> | 0.431<br>(0.030)               |
| Beth Israel + NIH + San Juan + Stanford<br>40% (N = 195,643) | All Sites       | Beth Israel + NIH +<br>San Juan + Stanford<br>(N = 61,657) | 0.756<br>(0.014)               | 0.828<br>(0.013) | <b>0.746</b><br><b>(0.019)</b> | 0.768<br>(0.019)               | <b>0.786</b><br><b>(0.018)</b> | 0.726<br>(0.020)               |
|                                                              | Individual Site | Beth Israel<br>(N = 24,780)                                | 0.744<br>(0.014)               | 0.812<br>(0.014) | <b>0.710</b><br><b>(0.020)</b> | 0.781<br>(0.018)               | <b>0.780</b><br><b>(0.019)</b> | 0.711<br>(0.020)               |
|                                                              | Individual Site | NIH<br>(N = 11,517)                                        | 0.694<br>(0.014)               | 0.712<br>(0.017) | <b>0.587</b><br><b>(0.029)</b> | 0.738<br>(0.016)               | <b>0.485</b><br><b>(0.026)</b> | 0.810<br>(0.016)               |
|                                                              | Individual Site | San Juan<br>(N = 5,974)                                    | 0.814<br>(0.012)               | 0.720<br>(0.021) | <b>0.627</b><br><b>(0.062)</b> | 0.826<br>(0.012)               | <b>0.188</b><br><b>(0.028)</b> | 0.972<br>(0.006)               |
|                                                              | Individual Site | Stanford<br>(N = 19,386)                                   | 0.792<br>(0.013)               | 0.793<br>(0.017) | <b>0.810</b><br><b>(0.014)</b> | 0.696<br>(0.035)               | <b>0.931</b><br><b>(0.009)</b> | 0.423<br>(0.029)               |
|                                                              | All Sites       | Beth Israel + NIH +<br>San Juan + Stanford<br>(N = 61,657) | 0.744<br>(0.014)               | 0.828<br>(0.013) | <b>0.707</b><br><b>(0.018)</b> | 0.802<br>(0.020)               | <b>0.845</b><br><b>(0.017)</b> | 0.641<br>(0.022)               |
|                                                              | Individual Site | Beth Israel<br>(N = 24,780)                                | 0.728<br>(0.014)               | 0.810<br>(0.014) | <b>0.666</b><br><b>(0.019)</b> | 0.825<br>(0.019)               | <b>0.857</b><br><b>(0.016)</b> | 0.611<br>(0.022)               |

|                                                               |                 |                                                            |                  |                  |                                |                  |                                |                  |
|---------------------------------------------------------------|-----------------|------------------------------------------------------------|------------------|------------------|--------------------------------|------------------|--------------------------------|------------------|
| Beth Israel + NIH + San Juan + Stanford<br>60% (N = 293,465)  | Individual Site | NIH<br>(N = 11,517)                                        | 0.676<br>(0.015) | 0.713<br>(0.017) | <b>0.543</b><br><b>(0.024)</b> | 0.767<br>(0.017) | <b>0.613</b><br><b>(0.025)</b> | 0.712<br>(0.018) |
|                                                               | Individual Site | San Juan<br>(N = 5,974)                                    | 0.803<br>(0.013) | 0.734<br>(0.020) | <b>0.525</b><br><b>(0.050)</b> | 0.835<br>(0.012) | <b>0.267</b><br><b>(0.031)</b> | 0.939<br>(0.009) |
|                                                               | Individual Site | Stanford<br>(N = 19,386)                                   | 0.786<br>(0.013) | 0.796<br>(0.016) | <b>0.794</b><br><b>(0.014)</b> | 0.733<br>(0.039) | <b>0.953</b><br><b>(0.008)</b> | 0.344<br>(0.029) |
| Beth Israel + NIH + San Juan + Stanford<br>80% (N = 391,287)  | All Sites       | Beth Israel + NIH +<br>San Juan + Stanford<br>(N = 61,657) | 0.753<br>(0.014) | 0.826<br>(0.013) | <b>0.752</b><br><b>(0.018)</b> | 0.755<br>(0.020) | <b>0.765</b><br><b>(0.019)</b> | 0.741<br>(0.020) |
|                                                               | Individual Site | Beth Israel<br>(N = 24,780)                                | 0.740<br>(0.014) | 0.809<br>(0.014) | <b>0.701</b><br><b>(0.020)</b> | 0.785<br>(0.019) | <b>0.789</b><br><b>(0.019)</b> | 0.696<br>(0.020) |
|                                                               | Individual Site | NIH<br>(N = 11,517)                                        | 0.690<br>(0.015) | 0.708<br>(0.017) | <b>0.598</b><br><b>(0.031)</b> | 0.721<br>(0.016) | <b>0.413</b><br><b>(0.027)</b> | 0.845<br>(0.015) |
|                                                               | Individual Site | San Juan<br>(N = 5,974)                                    | 0.808<br>(0.012) | 0.731<br>(0.020) | <b>0.627</b><br><b>(0.082)</b> | 0.814<br>(0.012) | <b>0.112</b><br><b>(0.021)</b> | 0.983<br>(0.005) |
|                                                               | Individual Site | Stanford<br>(N = 19,386)                                   | 0.790<br>(0.013) | 0.795<br>(0.016) | <b>0.823</b><br><b>(0.014)</b> | 0.659<br>(0.033) | <b>0.905</b><br><b>(0.011)</b> | 0.485<br>(0.030) |
| Beth Israel + NIH + San Juan + Stanford<br>100% (N = 489,109) | All Sites       | Beth Israel + NIH +<br>San Juan + Stanford<br>(N = 61,657) | 0.757<br>(0.014) | 0.830<br>(0.013) | <b>0.760</b><br><b>(0.018)</b> | 0.754<br>(0.020) | <b>0.759</b><br><b>(0.019)</b> | 0.754<br>(0.019) |
|                                                               | Individual Site | Beth Israel<br>(N = 24,780)                                | 0.745<br>(0.014) | 0.815<br>(0.014) | <b>0.721</b><br><b>(0.020)</b> | 0.767<br>(0.018) | <b>0.754</b><br><b>(0.019)</b> | 0.736<br>(0.019) |
|                                                               | Individual Site | NIH<br>(N = 11,517)                                        | 0.697<br>(0.014) | 0.718<br>(0.017) | <b>0.597</b><br><b>(0.029)</b> | 0.737<br>(0.016) | <b>0.476</b><br><b>(0.027)</b> | 0.821<br>(0.015) |
|                                                               | Individual Site | San Juan<br>(N = 5,974)                                    | 0.808<br>(0.013) | 0.727<br>(0.021) | <b>0.627</b><br><b>(0.079)</b> | 0.815<br>(0.013) | <b>0.116</b><br><b>(0.022)</b> | 0.982<br>(0.005) |
|                                                               | Individual Site | Stanford<br>(N = 19,386)                                   | 0.793<br>(0.013) | 0.796<br>(0.017) | <b>0.828</b><br><b>(0.014)</b> | 0.659<br>(0.033) | <b>0.902</b><br><b>(0.011)</b> | 0.503<br>(0.031) |



## SUPPLEMENTAL FIGURES

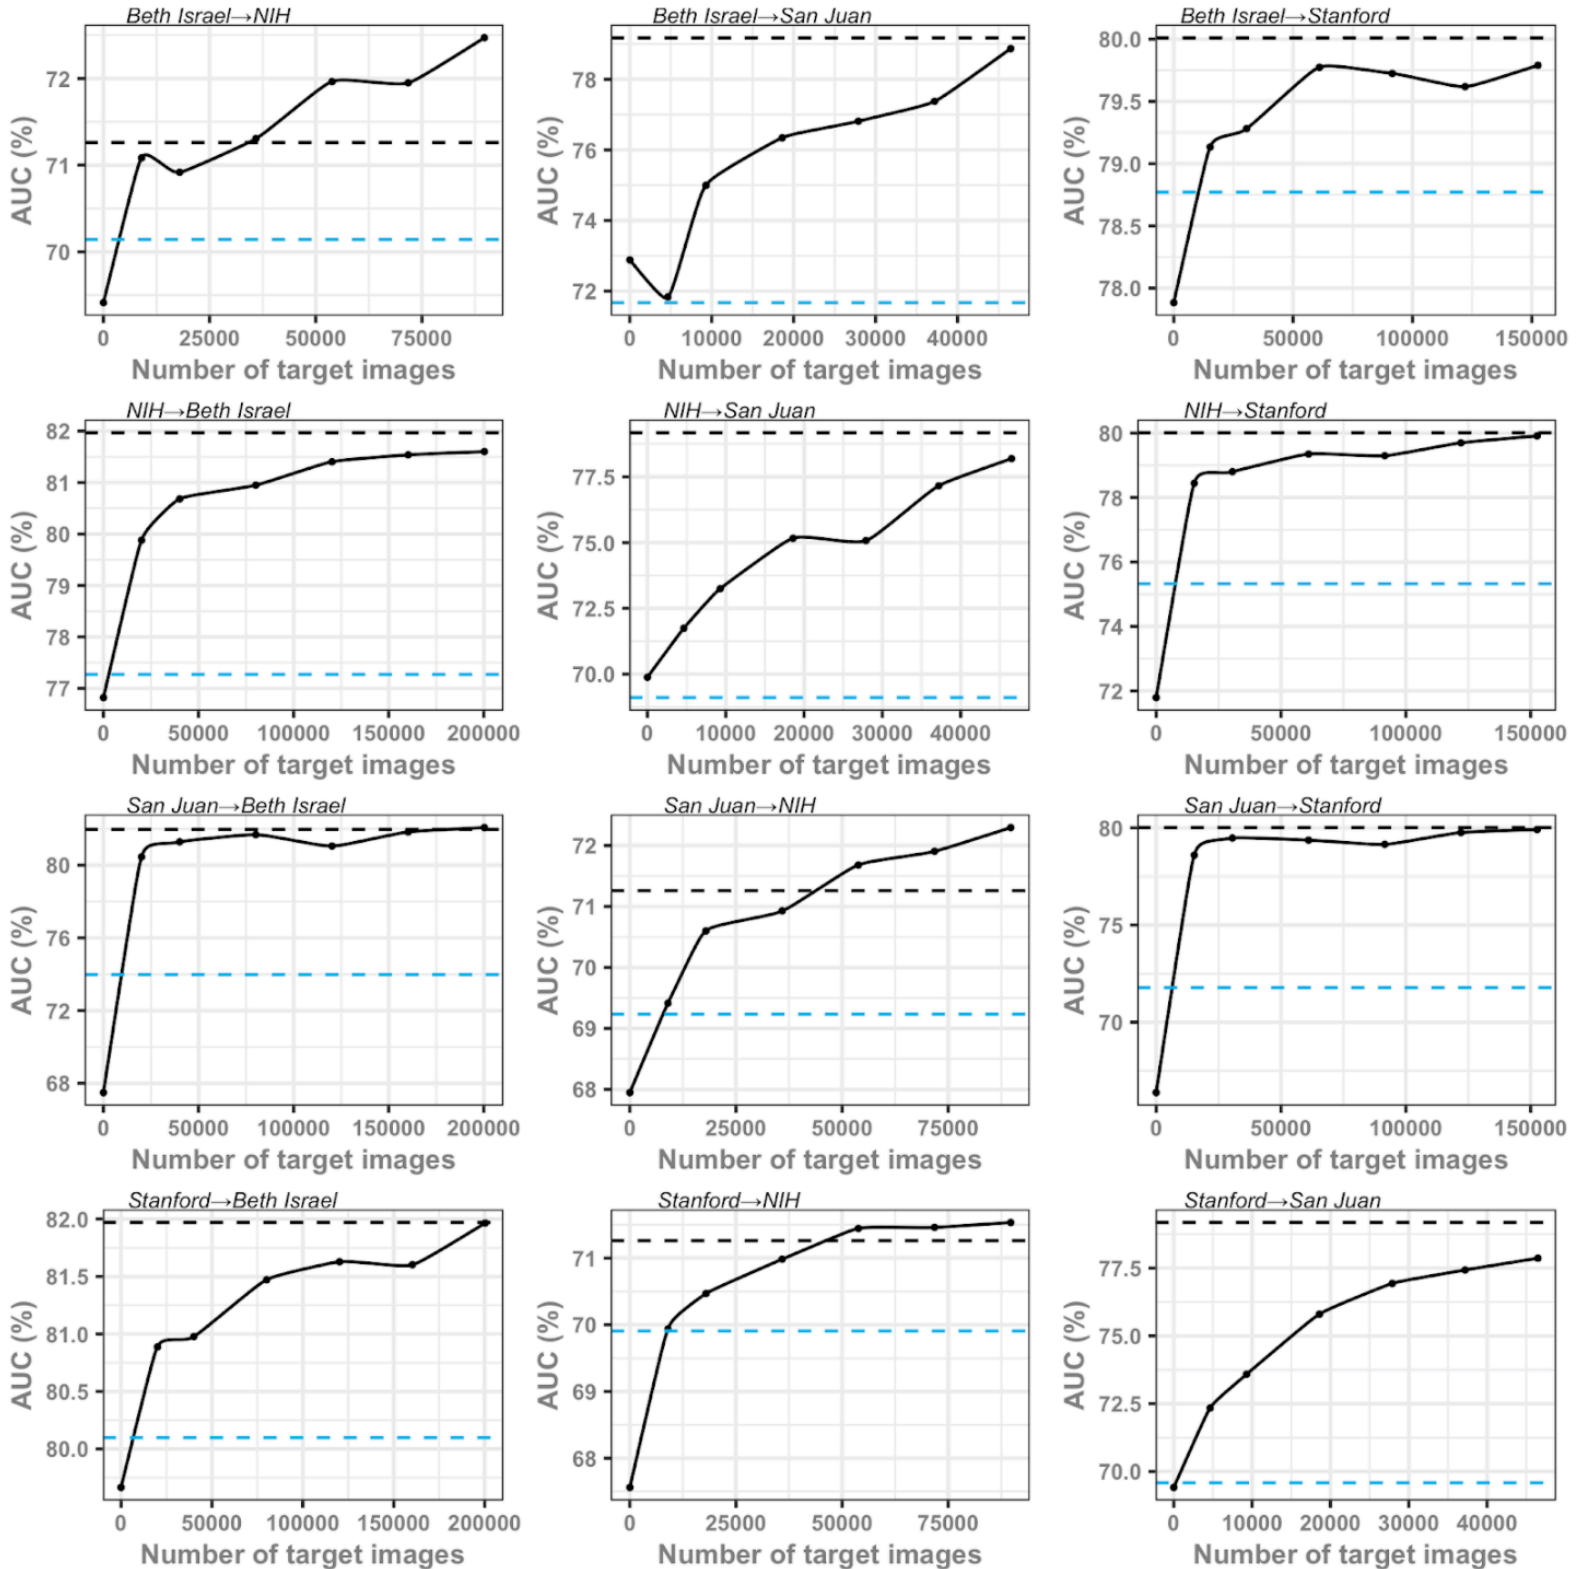

**Supplemental Figure 1. Results of simulation experiments conducted to determine the number of labelled chest x-rays from the target dataset required to improve performance of the baseline classifier as measured by area under the curve (AUC). The baseline classifier trained on the source training set was fine-tuned with incremental amounts of chest x-rays from the target training set to determine gains in AUC on the target test set for each source-target dataset pair. The blue line represents performance of the adapted classifier**

on the target test set whereas the black line represents the theoretical maximum performance on the target test set as obtained by a baseline classifier trained on the target training set.

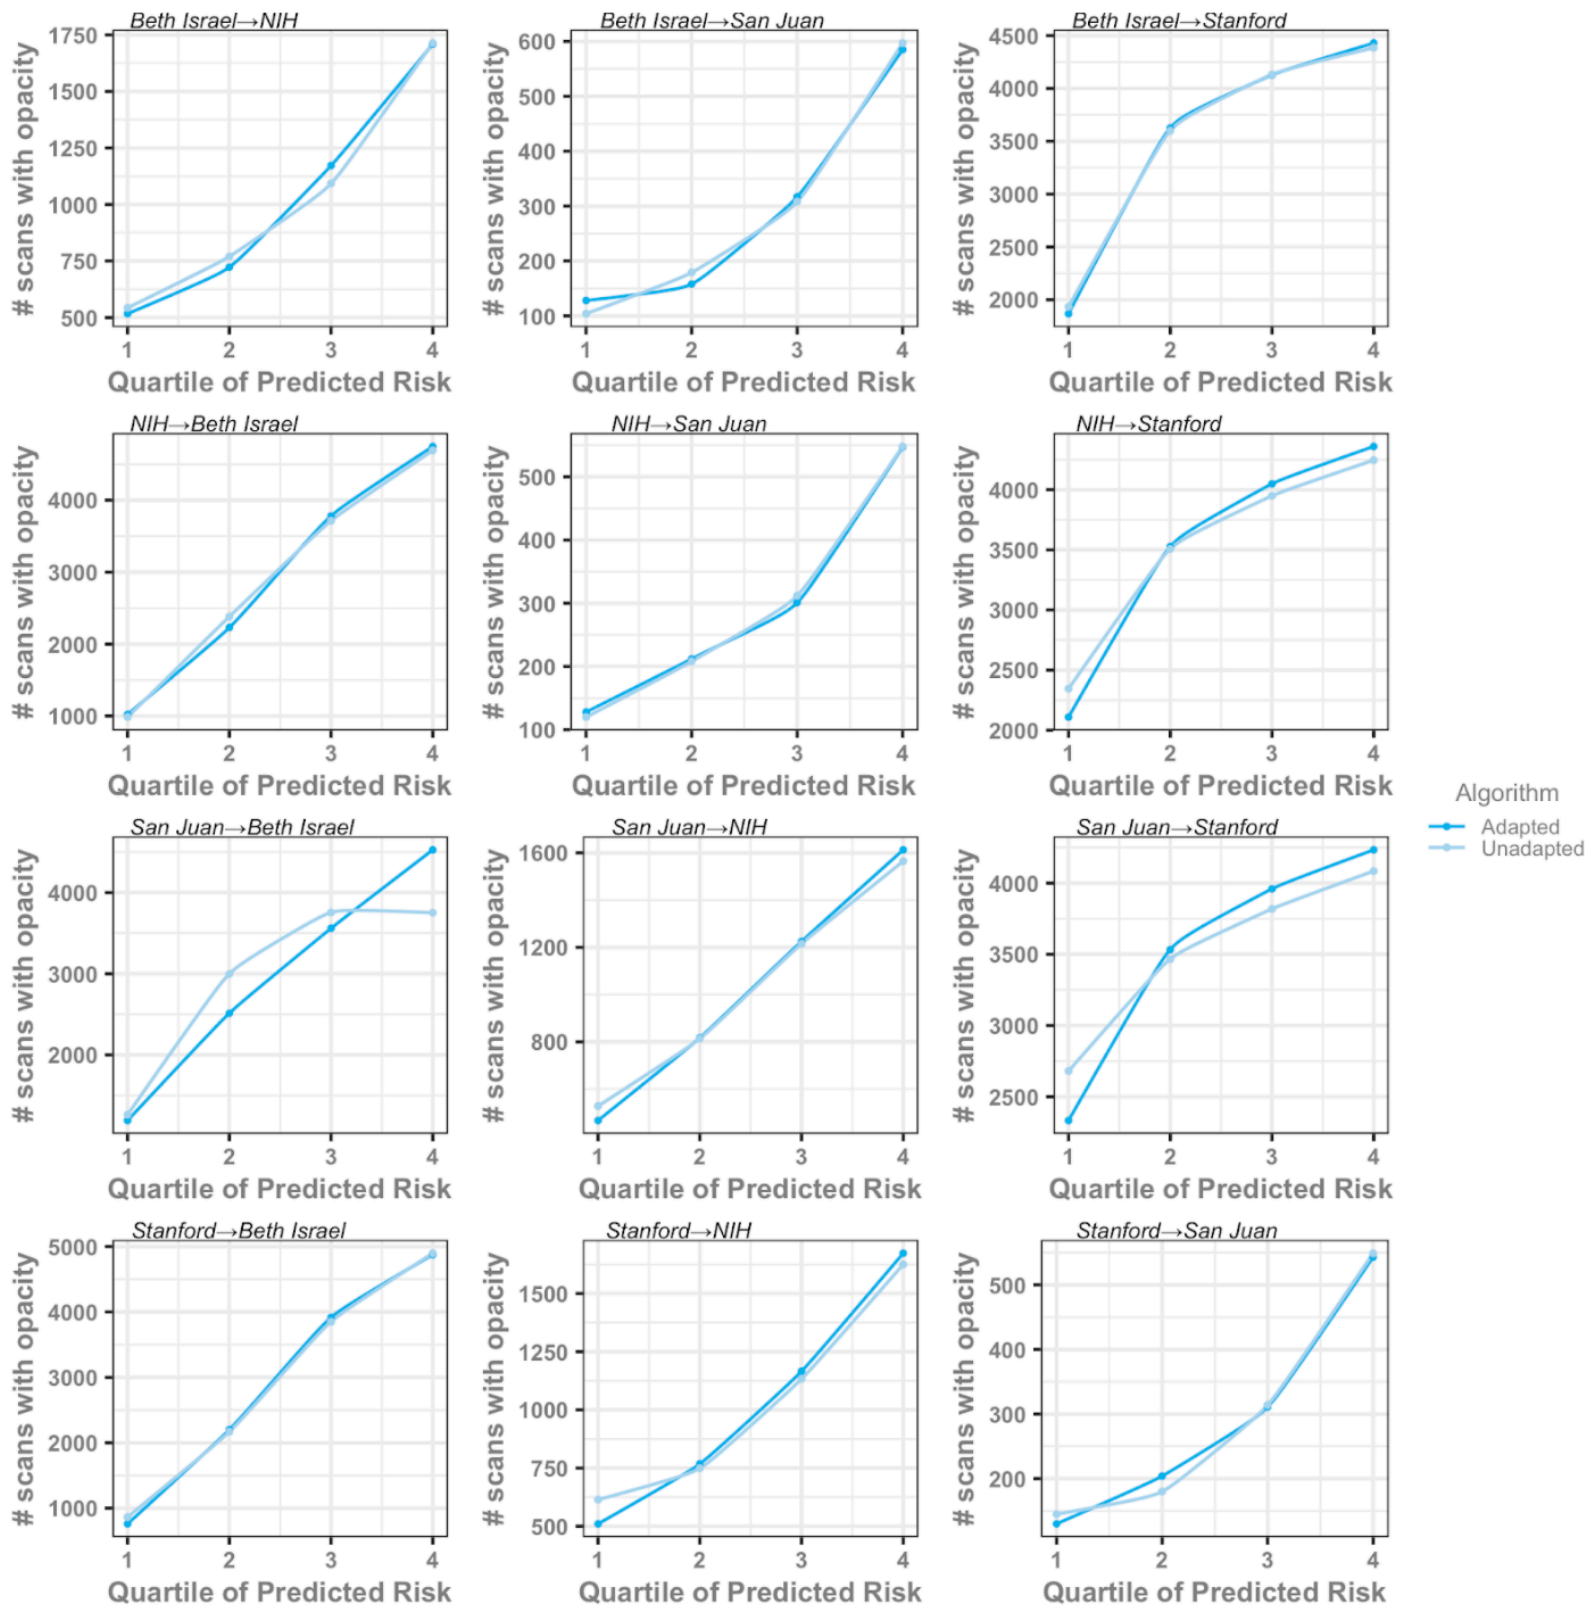

**Supplemental Figure 2. Calibration curves of adapted and baseline algorithms on source-target pairs of the chest x-ray datasets.**
